# Supplementary figures and images for: Metagenome-Based Exploration of Bacterial Communities Associated with Cyanobacteria Strains Isolated from Thermal Muds
Source: MDPI journal article supplement (doi:10.3390/microorganisms10122337), 2022-11-25

## Supplementary figure S1

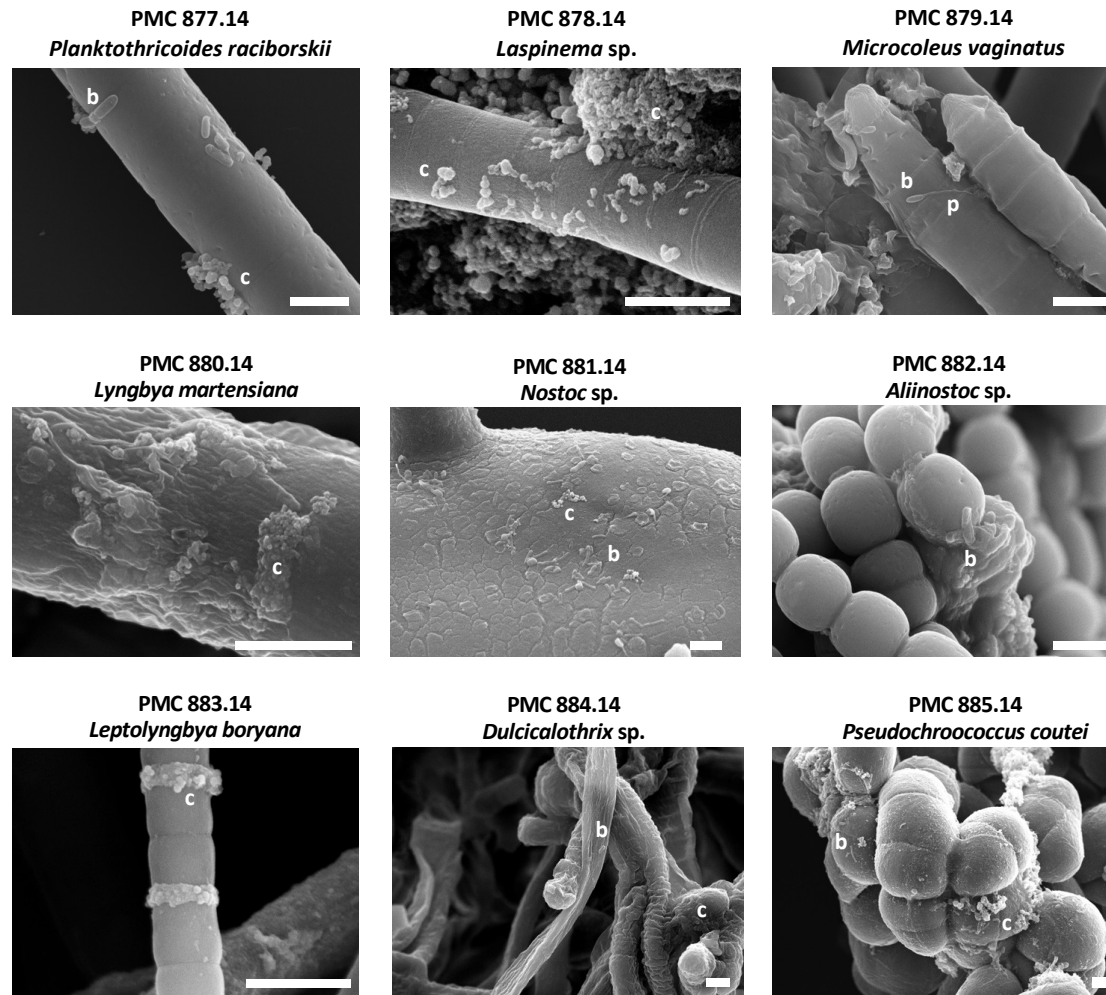

## Supplementary figure S2

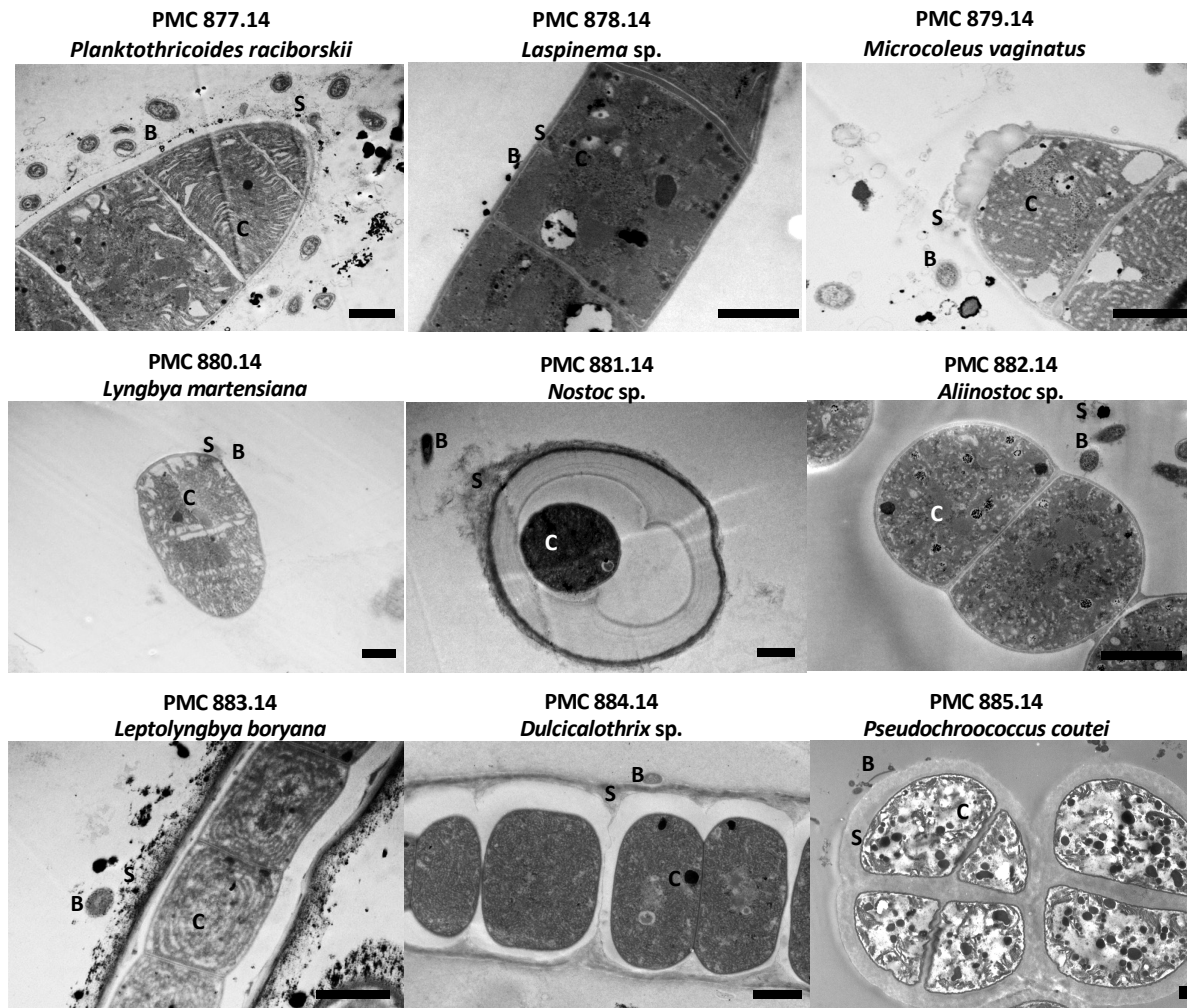

Supplement: s1 [file s1]
